# Supplementary material for: Mechanisms of mRNA processing defects in inherited THOC6 intellectual disability syndrome
Source: Research Square preprint supplement (doi:10.21203/rs.3.rs-2126145/v1), 2023-09-06
Supplement: Supplementary file 2 [file 3c58a675c877a394b7378164.docx]

**
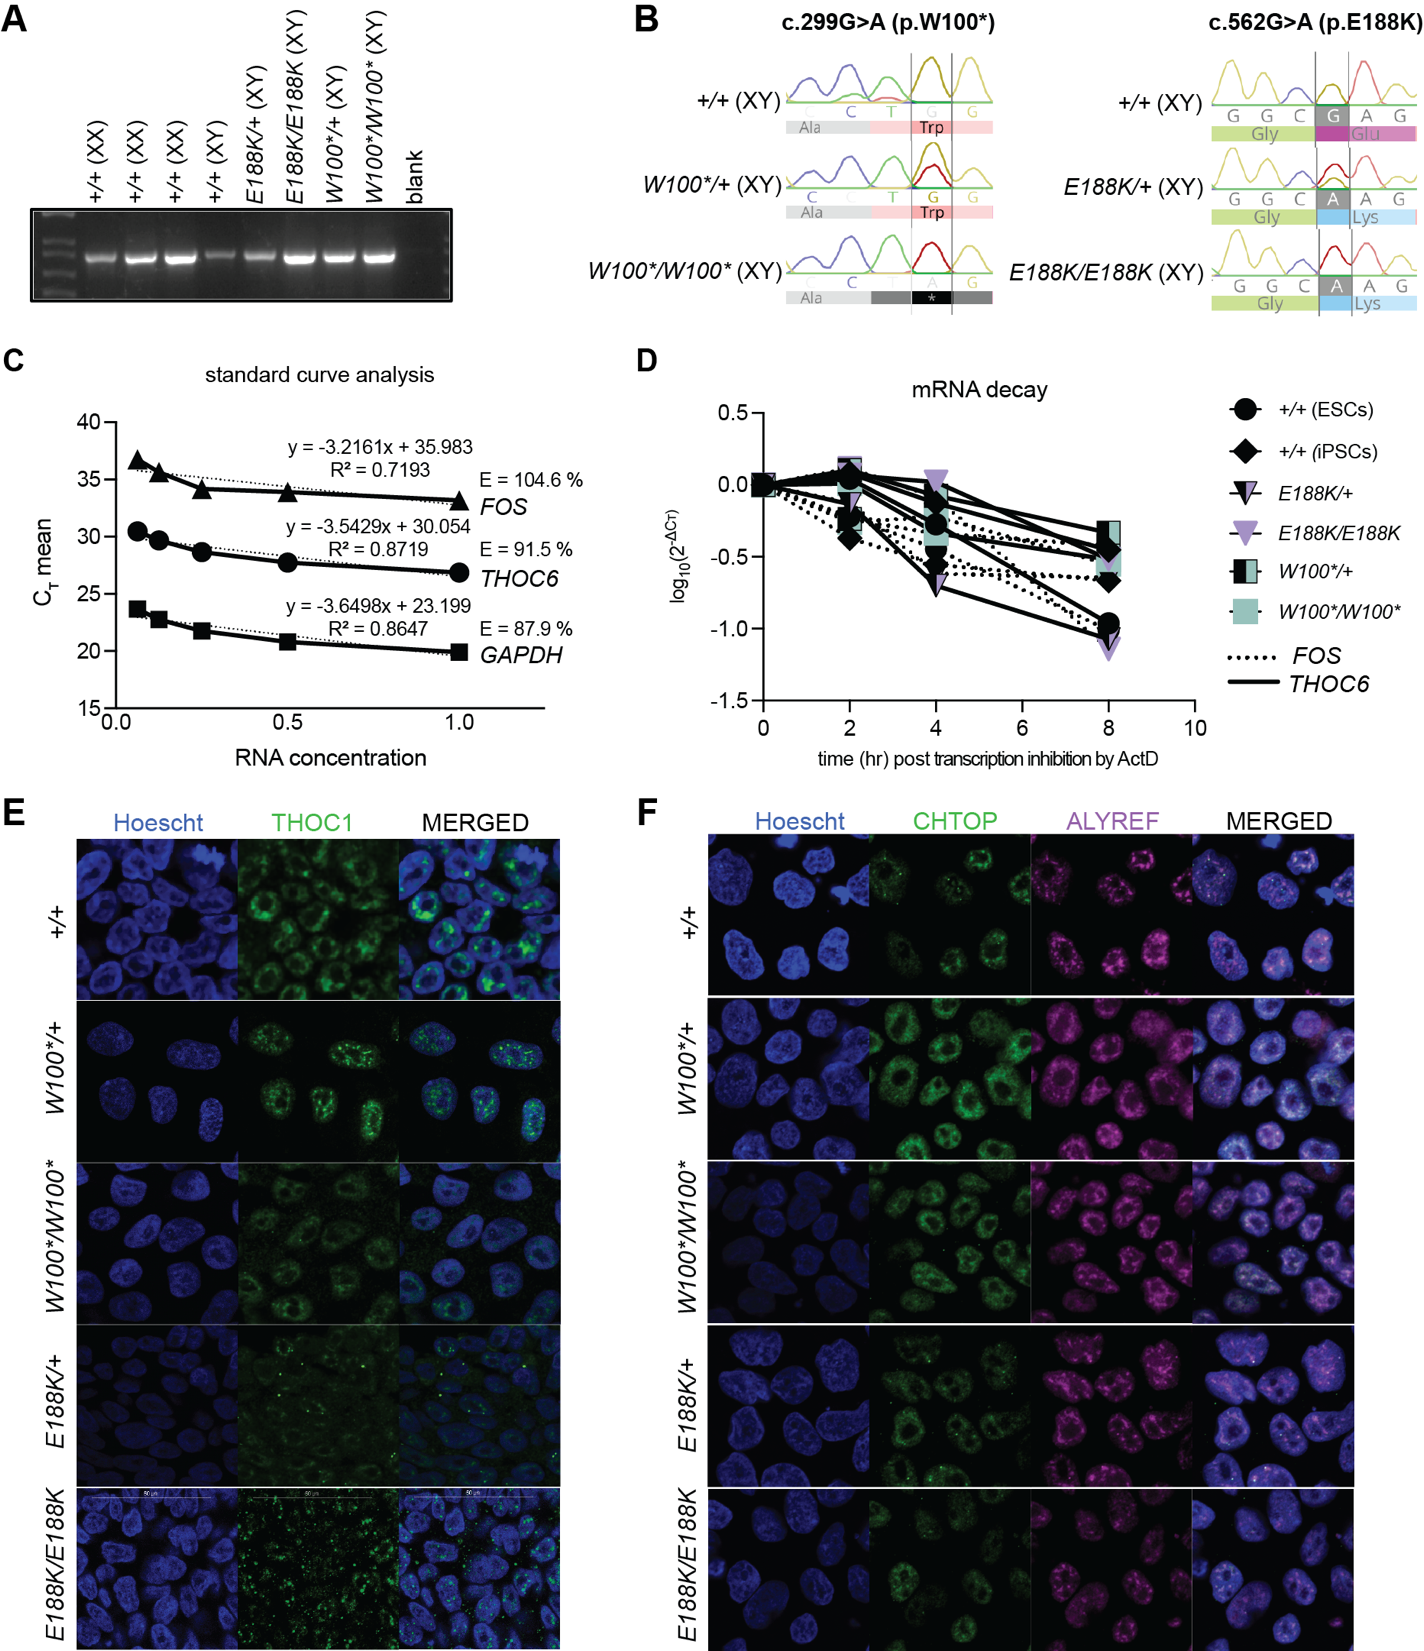
**

**Figure S1. Genetic mechanism of biallelic pathogenic *THOC6* variants***. See also Figures 1 and 2.* Confirmation of genotypes in human ESC/iPSC lines by PCR (A) and Sanger sequencing (B). (C) Standard curve analysis using 5 two-fold serial dilutions of control cDNA to confirm primer quality for *FOS, THOC6,* and *GAPDH* for mRNA stability assay*.* (D) mRNA decay curve for extended timeframe capturing *THOC6* and *FOS* RNA decay after 2.5 hrs following Actinomysin D treatment. Values were not normalized to *GAPDH* because control transcripts are also degraded after 2.5 hrs of transcription inhibition.Immunostaining to assess subcellular localization of THO/TREX complex members THOC1 (E), and CHTOP and ALYREF (F) in human ESC/iPSCs with biallelic pathogenic *THOC6* variants compared to heterozygous and wildtype unaffected controls.

**
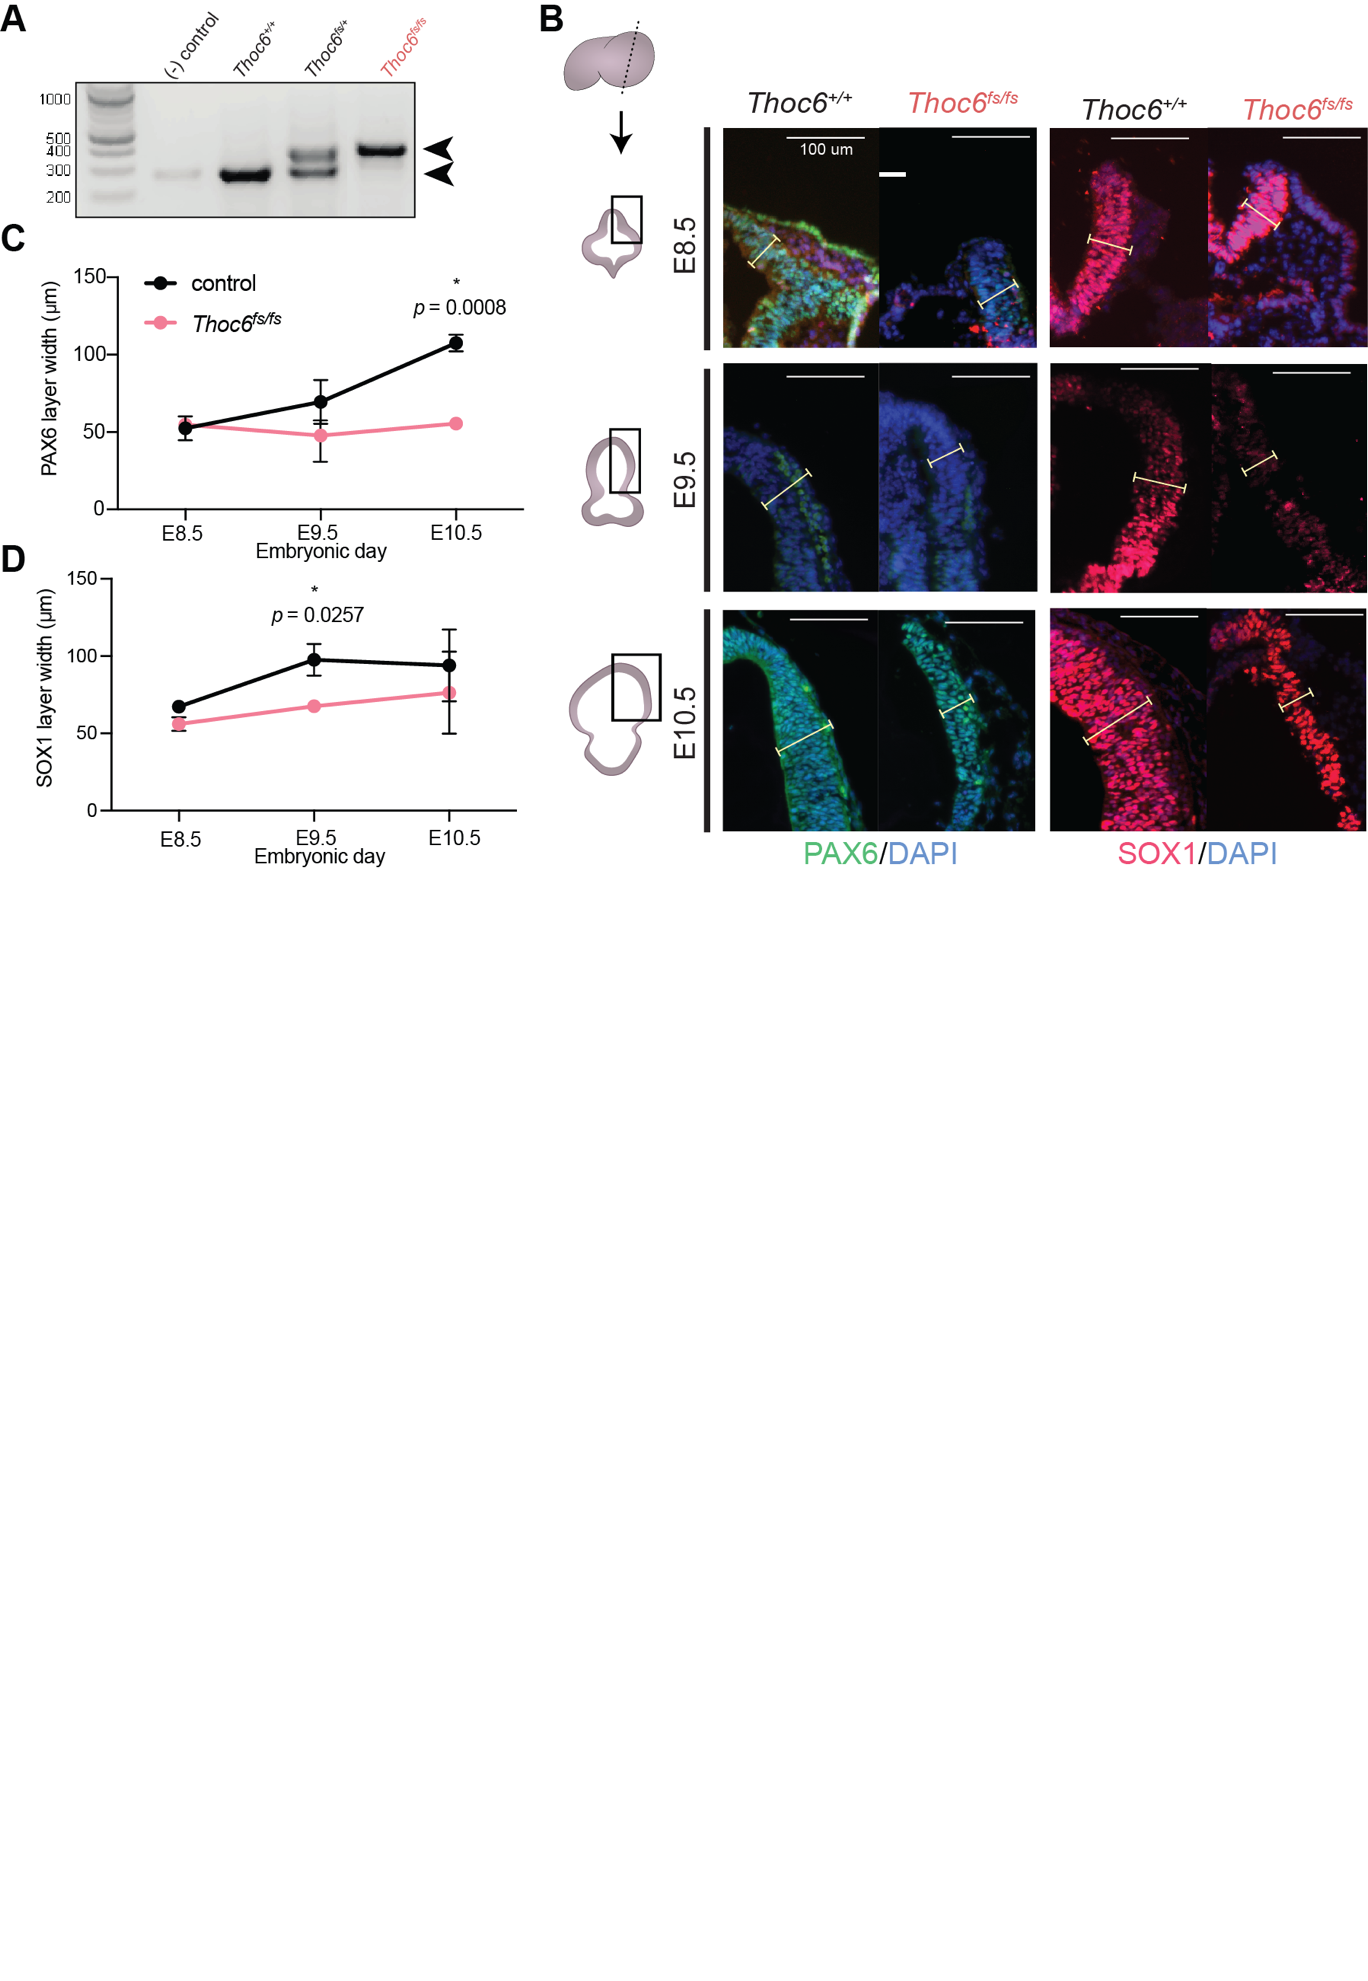
Figure S2. Generation of *Thoc6fs/fs* mouse model.** *See also Figure 3.*(A) Gel of allele-specific PCR confirming *Thoc6* frameshift alleles. (B) Immunostaining of the neural plate and neural tube in *Thoc6fs/fs* mice relative to *Thoc6+/+* control littermates at E8.5-10.5 for Pax6 (C) and Sox1 (D), with layer width quantifications (right). Two-sided paired Student’s *t* test*. n.s.*, not significant. Scale bar: 100 μm.


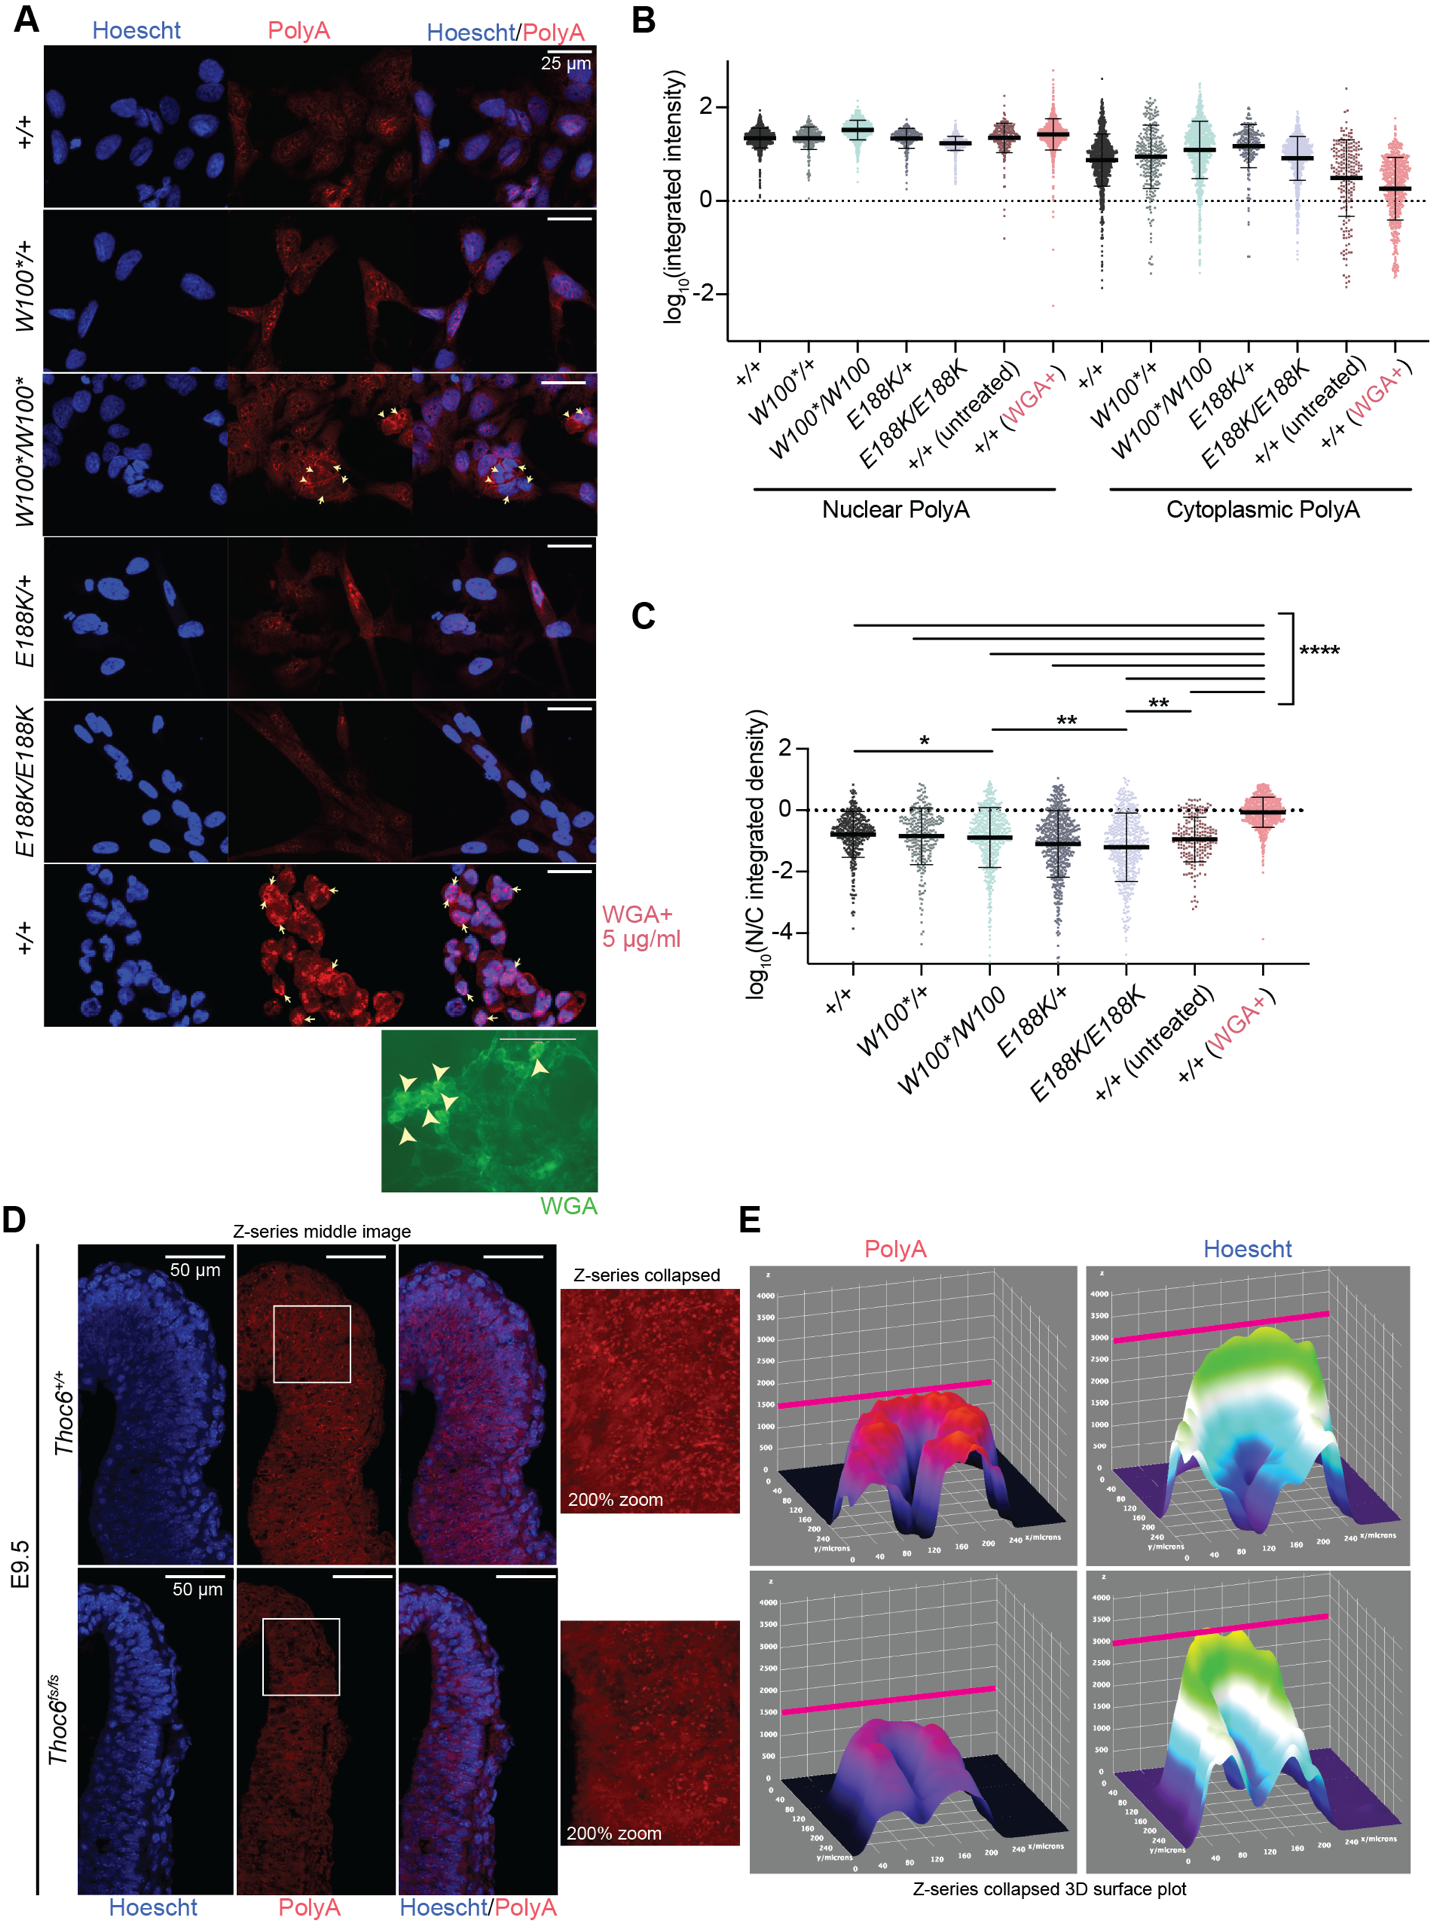
**Figure S3. Characterization of bulk mRNA export across genotypes.** *Related to Figures 3-6).*(A) Oligo-dT FISH Z-collapsed confocal images (40x magnification) of NPCs differentiated from iPSCs with the following genotypes: *THOC6+/+*, *THOC6W100*/W100**, *THOC6W100*/+*, *THOC6E188K/E188K, THOC6E188K/+*. Arrows point to cells showing extreme signal differences. As a positive control for impaired nuclear export resulting in aberrant accumulation of transcripts in the nucleus, *THOC6+/+* were treated with WGA at 5 μg/ml which acts to block the nuclear pore complex (bottom). Scale bar: 25 μm. (B)Intensity quantifications from 200-700 cells per genotype from three replicates were performed using an automated CellProfiler (v4.2.1) pipeline 129 that measures polyA signal in nuclear and cytoplasmic fractions. Variability in polyA+ signal intensity observed across genotypes is likely due to slight technical variation in the assay across replicate slides. (C) Ratios of nuclear to cytoplasmic polyA showing minimal differences in bulk export across genotypes relative to WGA+ positive control. (D) Oligo-dT FISH of E9.5 *Thoc6+/+* and *Thoc6fs/fs* mouse neuroepithelium; Z-series middle image (left). Scale bar: 50 μm. White box represents zoomed in area. (Right) 200% zoom of polyA signal in Z-series collapsed image by maximum intensity. (E) 3D surface plot for Z-series collapsed image of polyA intensity (left) and Hoescht intensity (right) in *Thoc6+/+* E9.5 neuroepithelium (top) and *Thoc6fs/fs* E9.5 neuroepithelium (bottom).


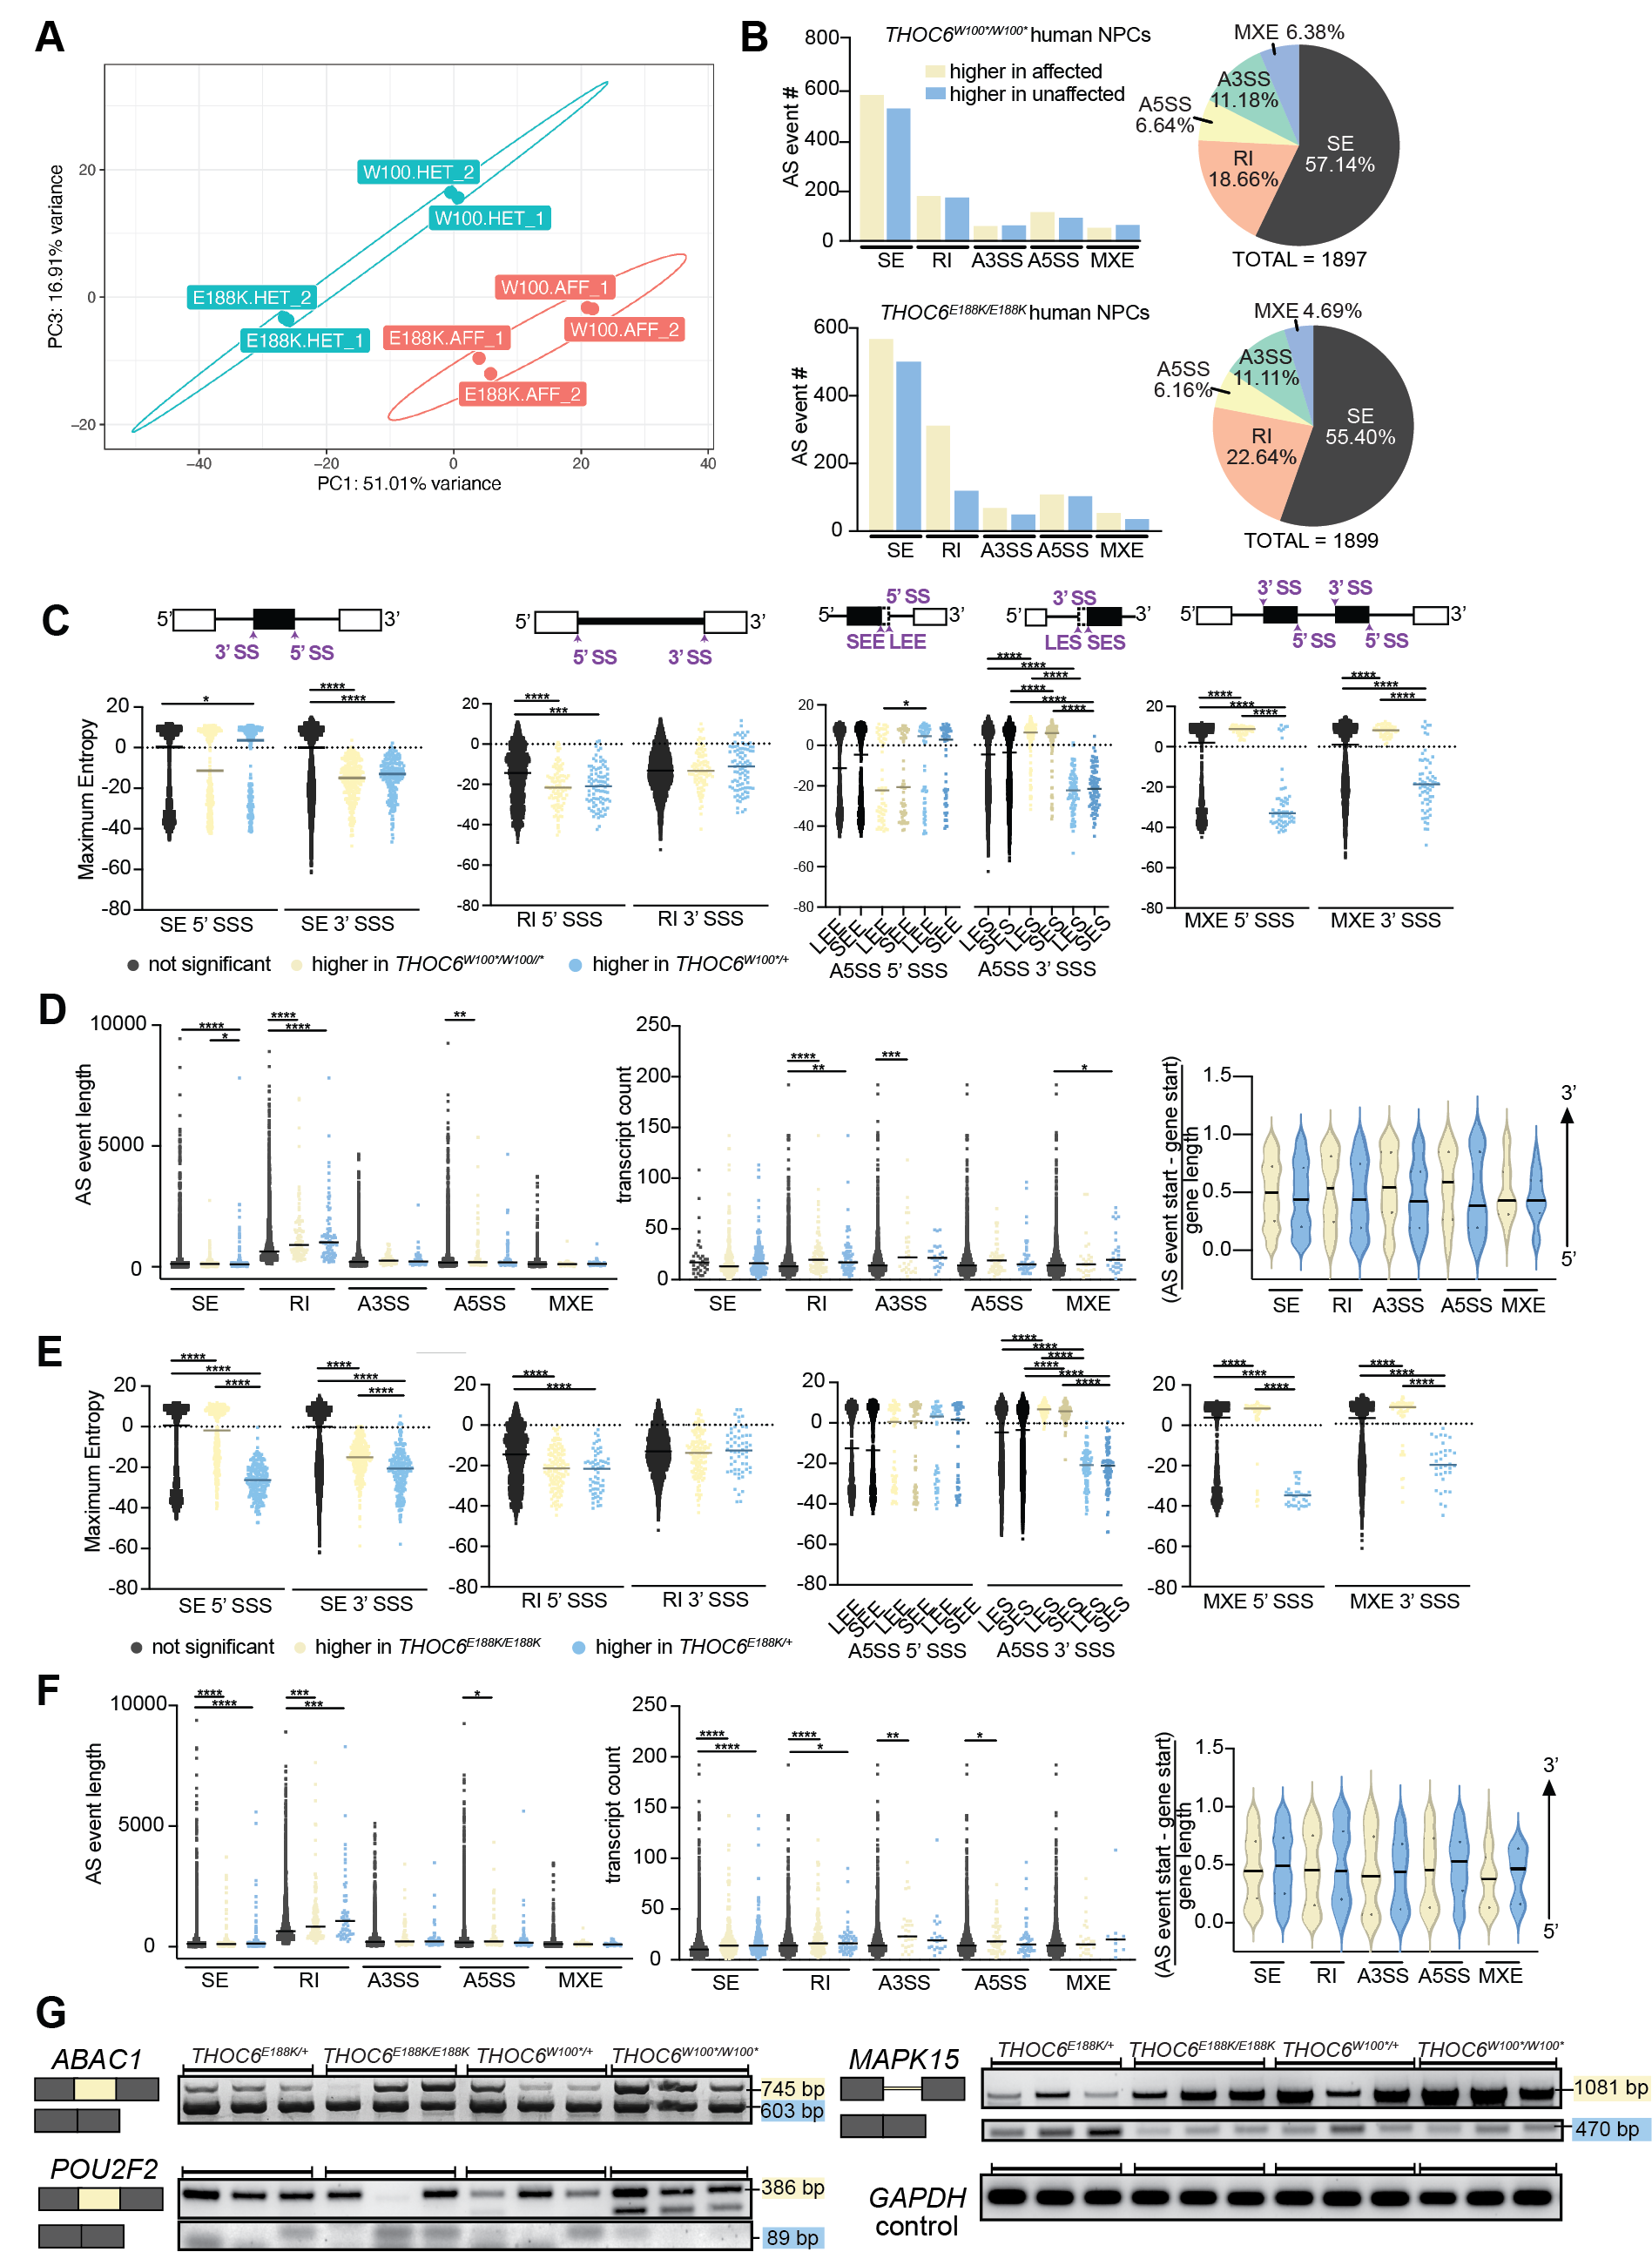
**Figure S4. Characterization of alternative splicing events in *THOC6* affected hNPCs.** *See also Figure 4.*(A) PCA of hNPCs RNAseq samples showing separation by condition (unaffected (E188K_HET, W100_HET) and affected (E188K_AFF, W100_AFF)). (B)rMATS summary analysis on *THOC6W100*/W100** versus *THOC6W100*/+*hNPCs (top) and *THOC6E188K/E188K* versus *THOC6E188K/+* hNPCs (bottom). Differences in splicing patterns were comparable in both *THOC6E188K/E188K* versus *THOC6E188K/+* and *THOC6E188K/E188K* versus *THOC6W100*/+* comparisons, as well as compared to *THOC6W100*/W100** versus *THOC6W100*/+* (see Table S5 and Figure 4). Blue, excluded in affected; yellow, included in affected. 5’ and 3’ splice site strengths (SSS) (C), and event length, transcript count, and event position (D) per AS event in *THOC6W100*/W100** hNPCs. Long exon start, LES; short exon start, SES; long exon end, LEE; short exon end, SEE. 5’ and 3’ splice site strengths (E), and event length, transcript count, and event position (F) per AS event in *THOC6E188K/E188K* hNPCs. (G) RT-PCR gels across three biological hNPC replicates per genotype for *ABAC1*, *POU2F2*, and *MAPK15* AS events and *GAPDH* loading control. Some variation across replicates was noted.


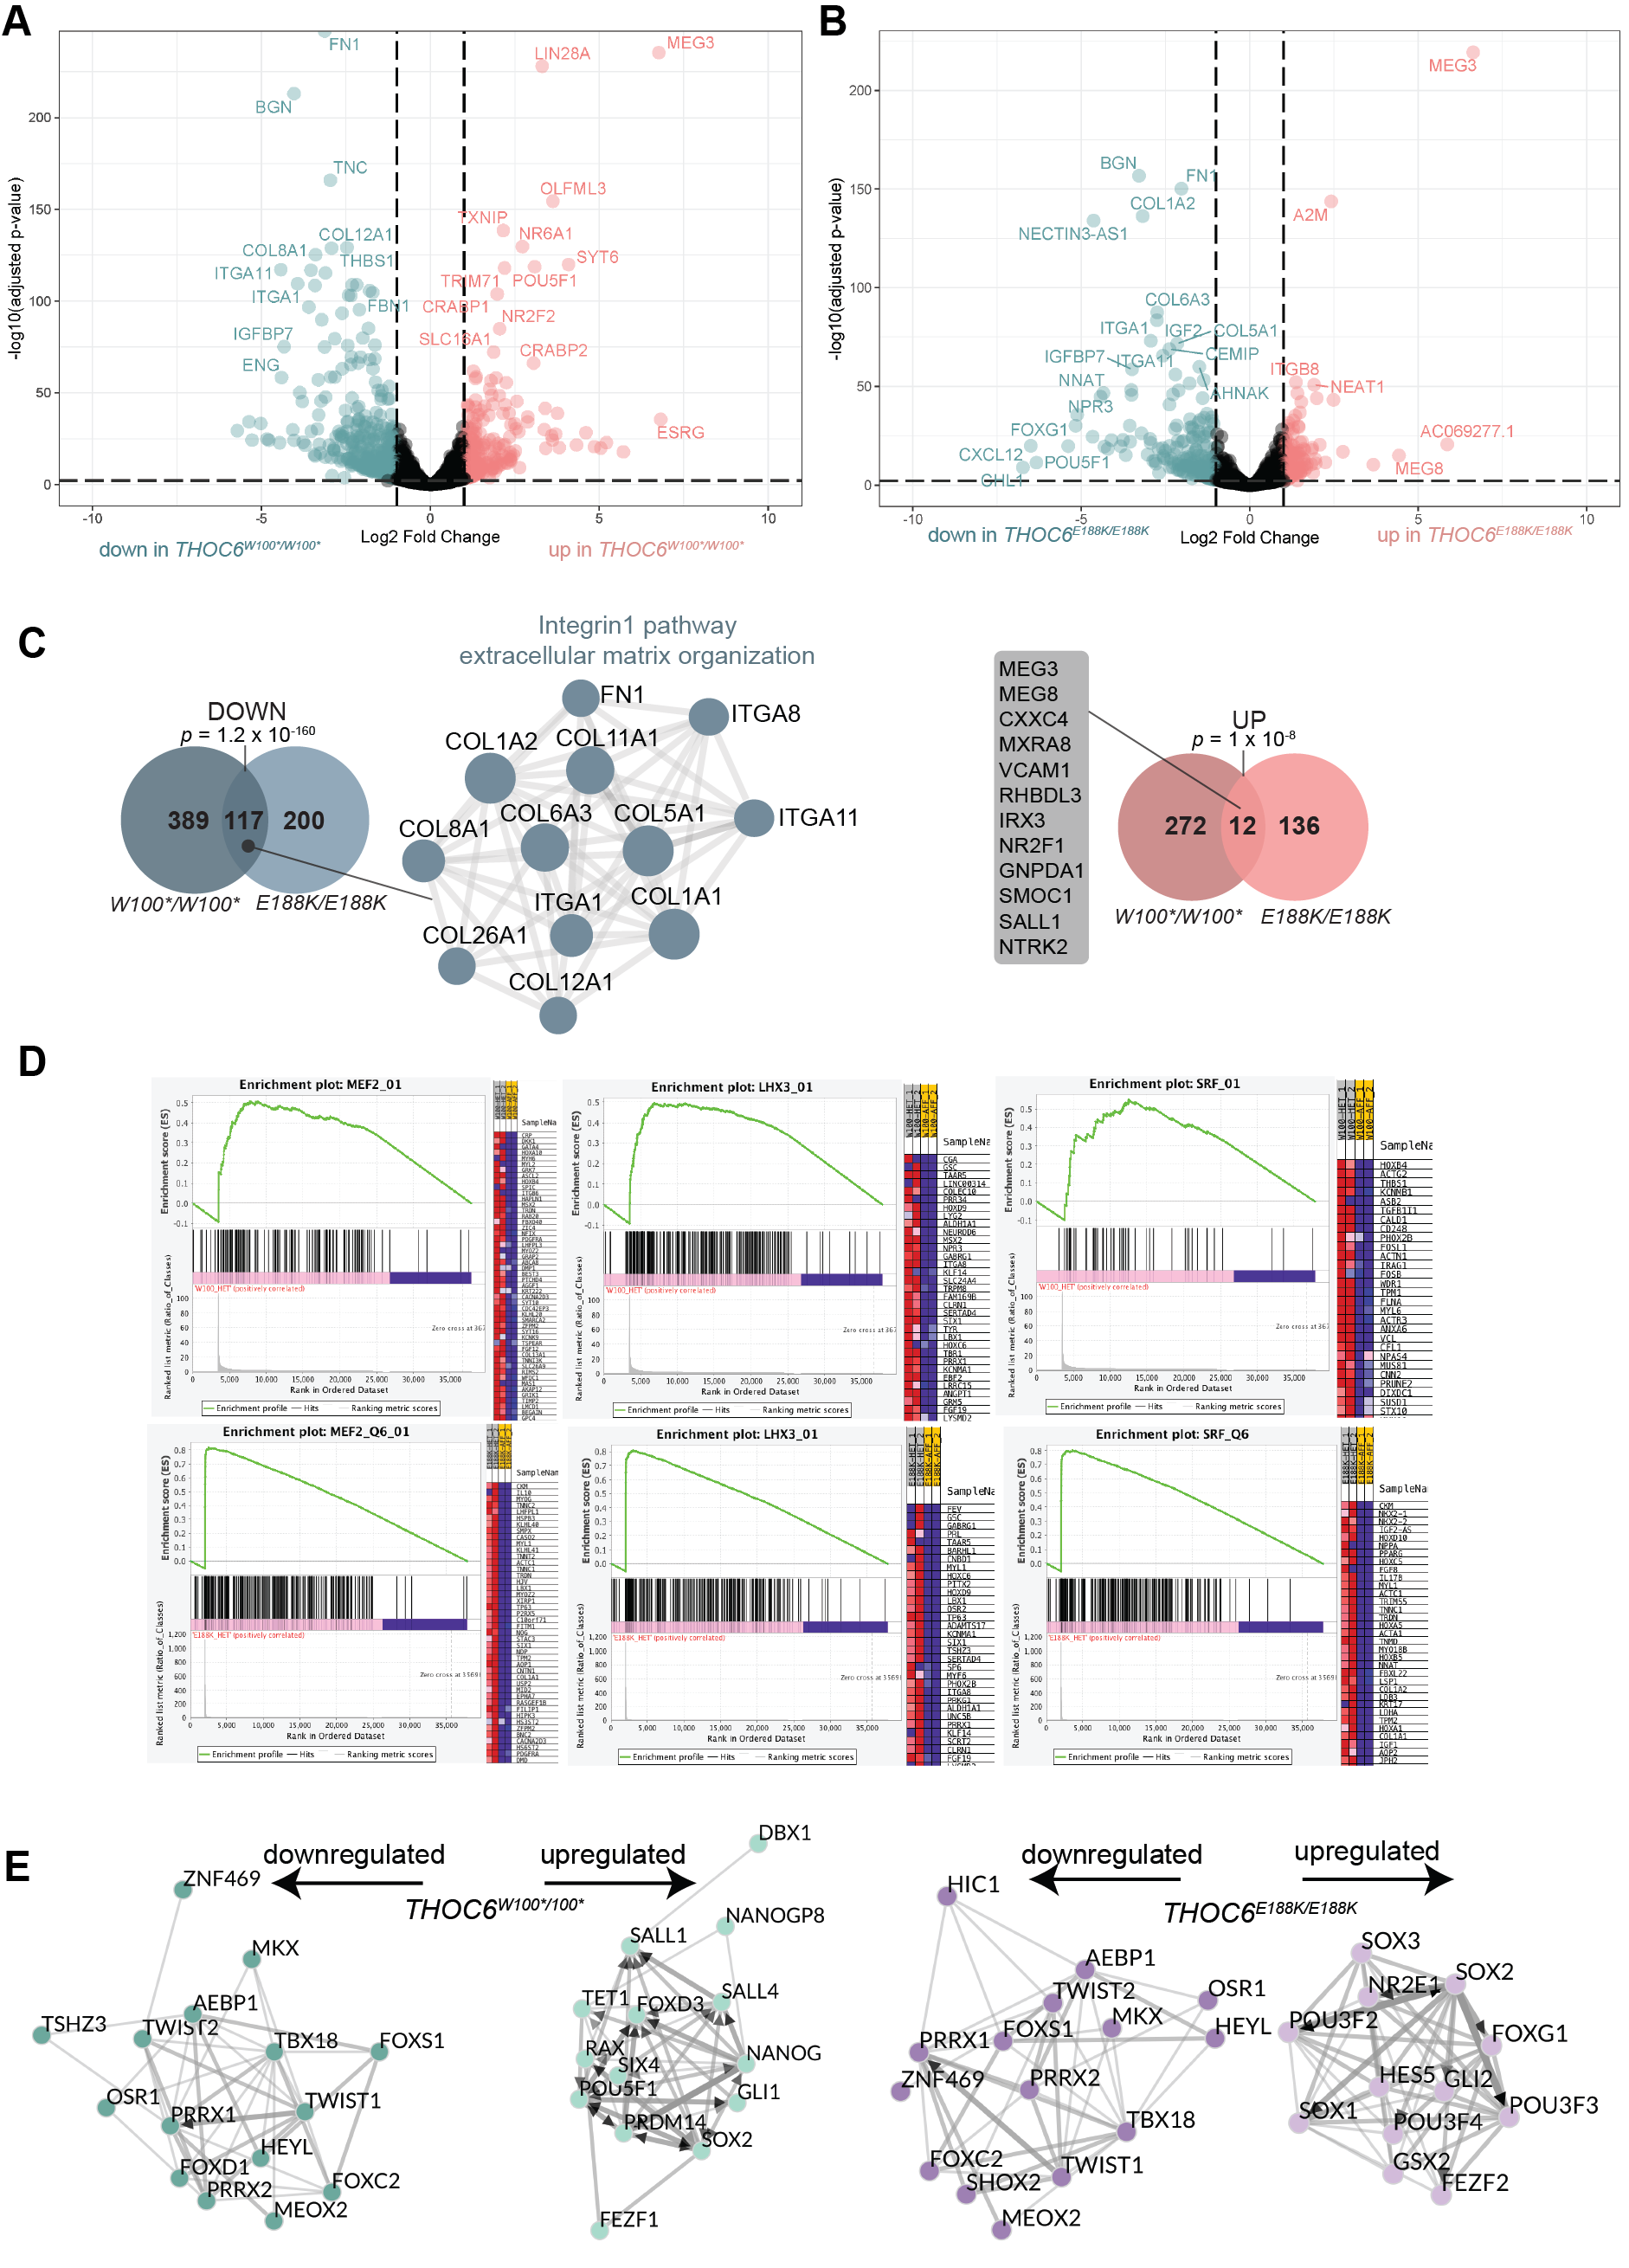
**Figure S5. Differential expression analysis in affected hNPCs.** *See also Figure 5.*Volcano plot of differential expression in *THOC6W100*/W100** (A) and *THOC6E188K/E188K* (B) NPCs relative to *THOC6W100*/+* controls. Data represent analysis of two biological replicates per genotype. The later comparison was chosen following observation of upregulated skeletal muscle genes in *THOC6E188K/+* hNPC replicates, indicating issues during the differentiation of this line. (C) Gene overlap of *THOC6W100*/W100** and *THOC6E188K/E188K* downregulated (left, blue) and upregulated (right, red) genes. Metascape protein-protein network enrichment analysis identifies integrin1 pathway and extracellular matrix modules enriched among genes downregulated in both genotypes.(D) GSEA enrichment plots for top transcription factors using the transcription factor motif gene dataset (c4.tftv7.5.1.symbols.gmt) in *THOC6W100*/W100** (top) *THOC6E188K/E188K* (bottom). (E) ChEA3 transcription factor motif enrichment of DEGs in *THOC6W100*/W100** (left, green) and *THOC6E188K/E188K* (right, purple) NPCs.


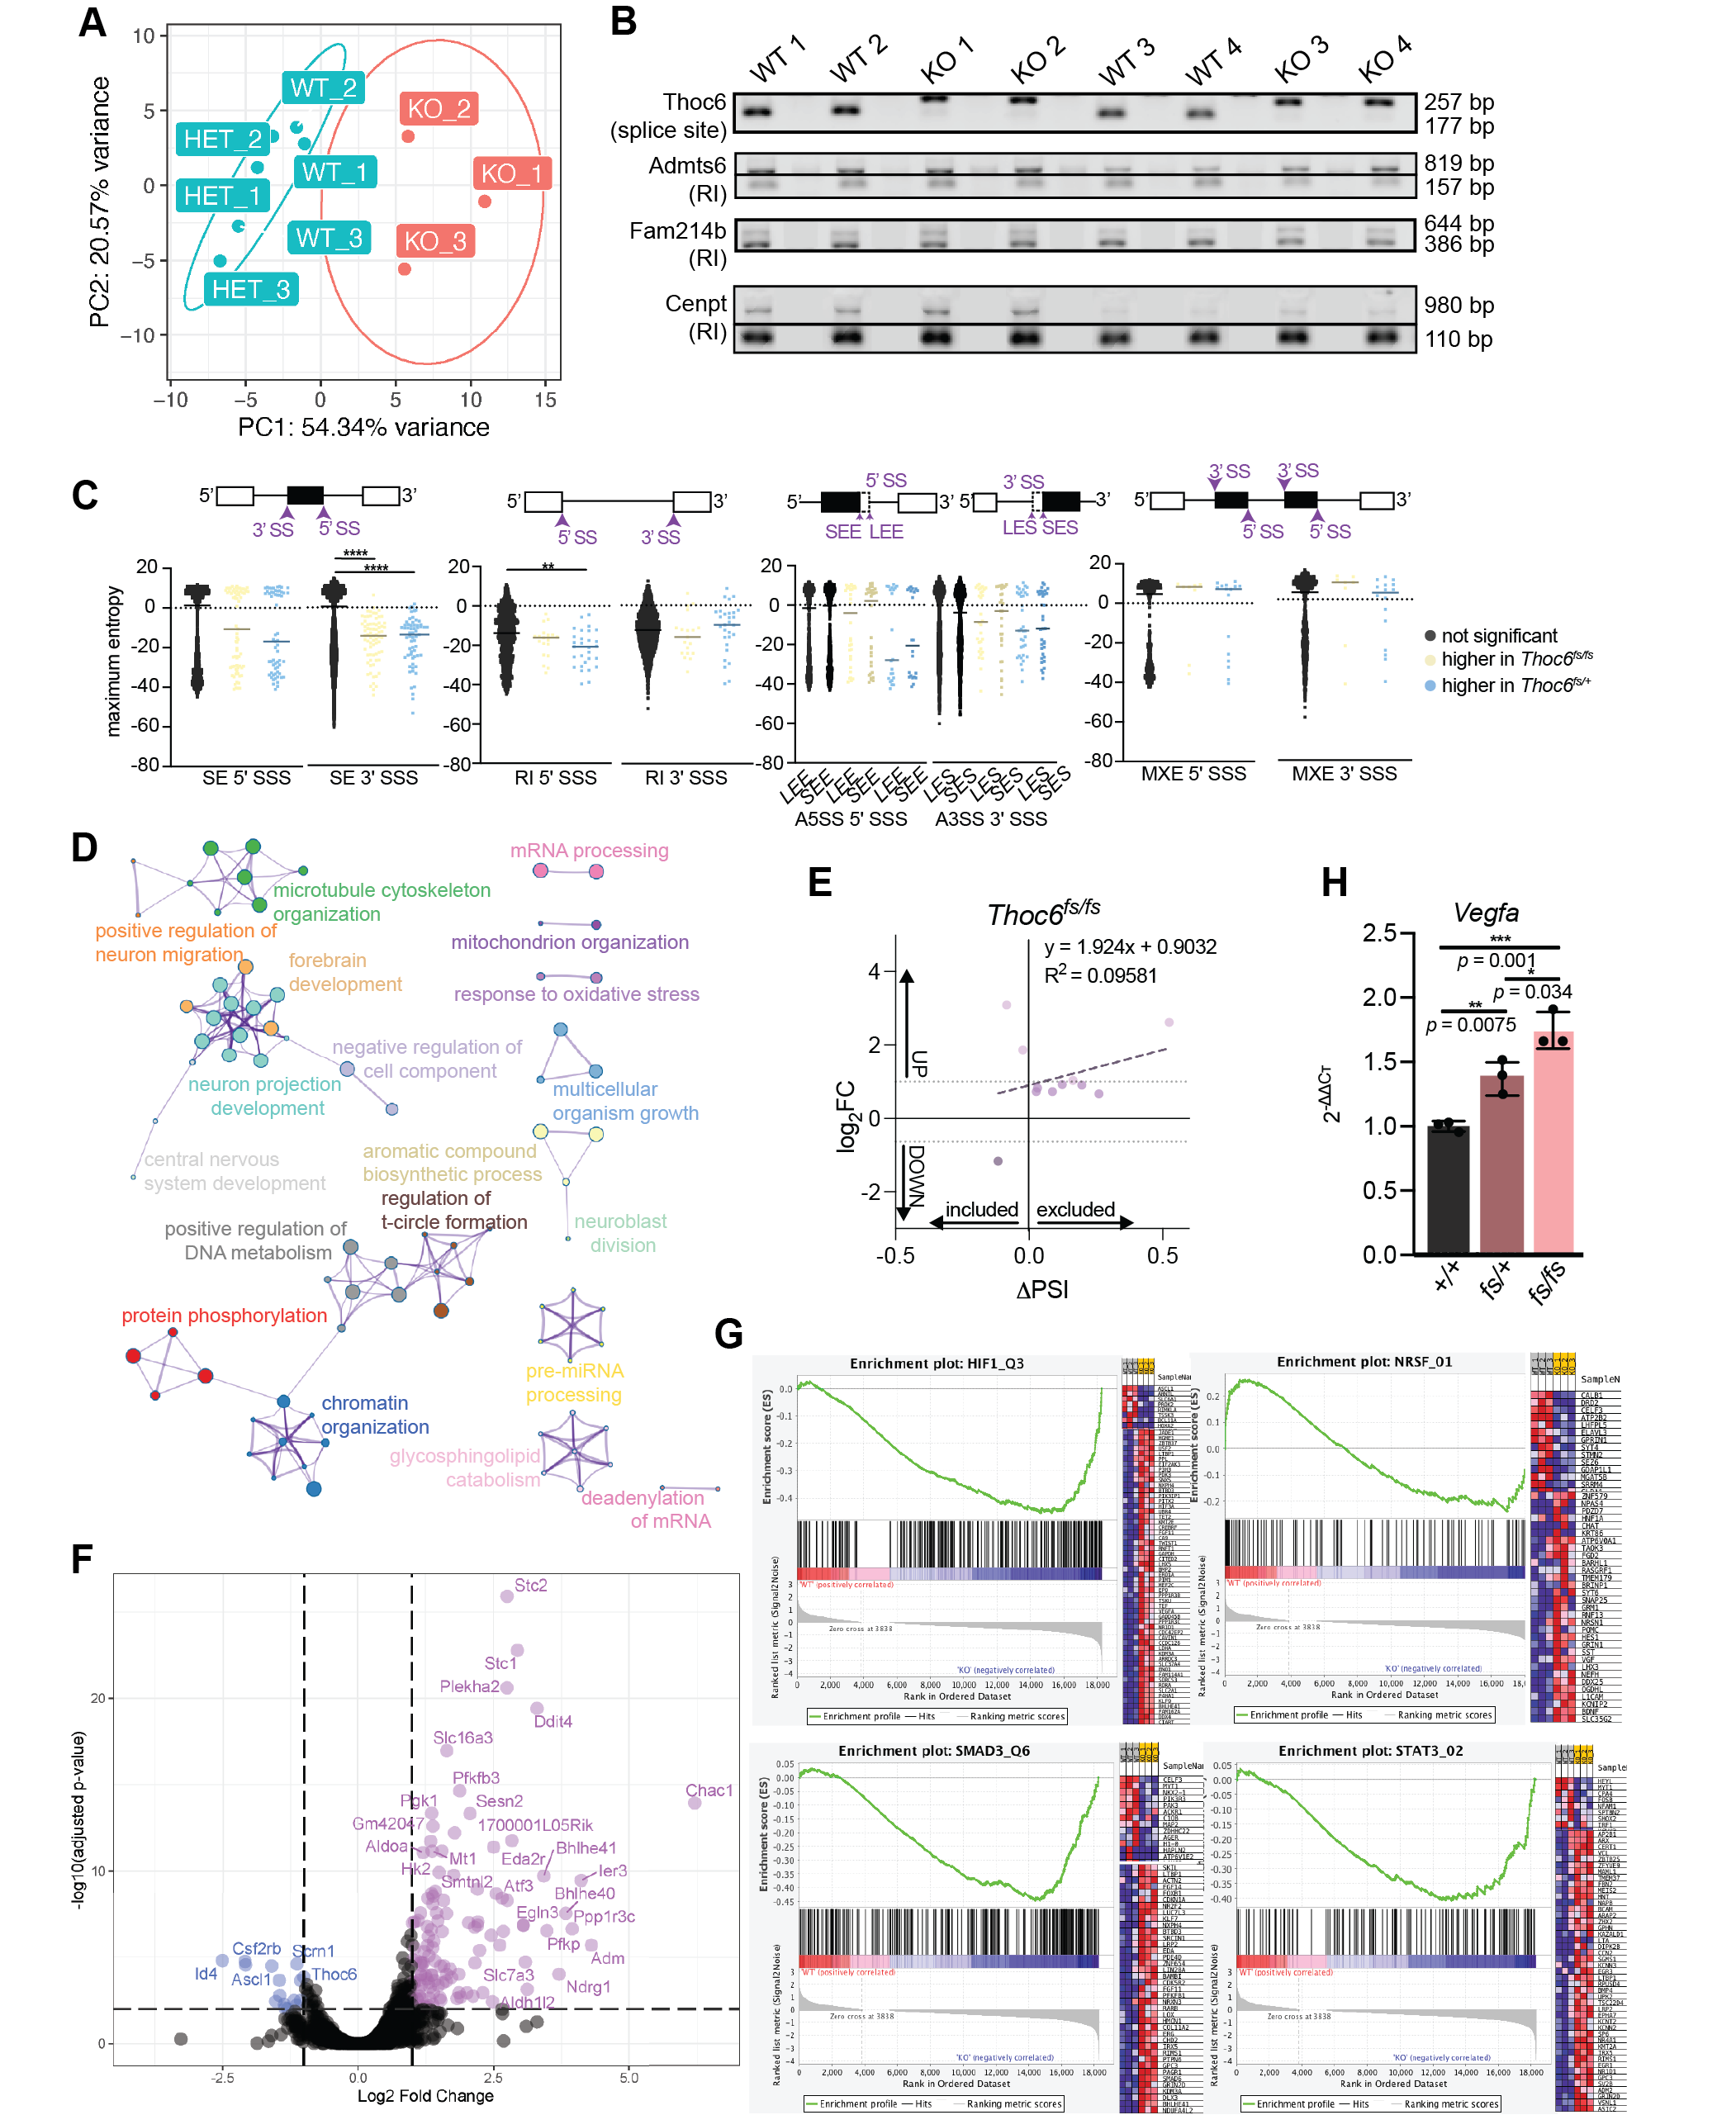


**Figure S6. Characterization of mRNA processing defects in *Thoc6fs/fs* mouse E9.5 forebrain.** *See also Figure 6.*(A) PCA of mouse E9.5 forebrain RNAseq samples showing separation by genotype (wildtype (WT), heterozygous (HET), homozygous for frameshift (KO). (B) RT-PCR gels across four biological replicates per genotype in two litters showing *Thoc6*, *Admts6*, *Fam214b*, and *Cenpt* AS events. (C) 5’ and 3’ splice site strengths (SSS) across AS events in *Thoc6fs/fs* mouse E9.5 forebrain*.* Blue, excluded in affected; yellow, included in affected. Long exon start, LES; short exon start, SES; long exon end, LEE; short exon end, SEE. (D) Metascape visualization of enriched biological categories among AS genes in *Thoc6fs/fs* with FDR < 0.05, ΔPSI < -0.1 or > 0.1, and average read coverage > 5. (E) Linear regression analysis of log2foldchange and Δ percent transcripts spliced in (PSI) for significant retained intron events in *Thoc6fs/fs*cells. (F) Volcano plot of differential expression analysis in *Thoc6fs/fs* relative to *Thoc6+/+* control. Data represent three biological replicates per genotype. (G) GSEA enrichment plots for top transcription factors for in E9.5 *Thoc6fs/fs* forebrain. (H) qPCR relative abundance for mouse E9.5 forebrain (relative to wildtype) for *Vegfa.* Three technical replicates of two biological replicates per genotype.Significance, two-tailed unpaired *t* test. Data shown as mean ±SEM.


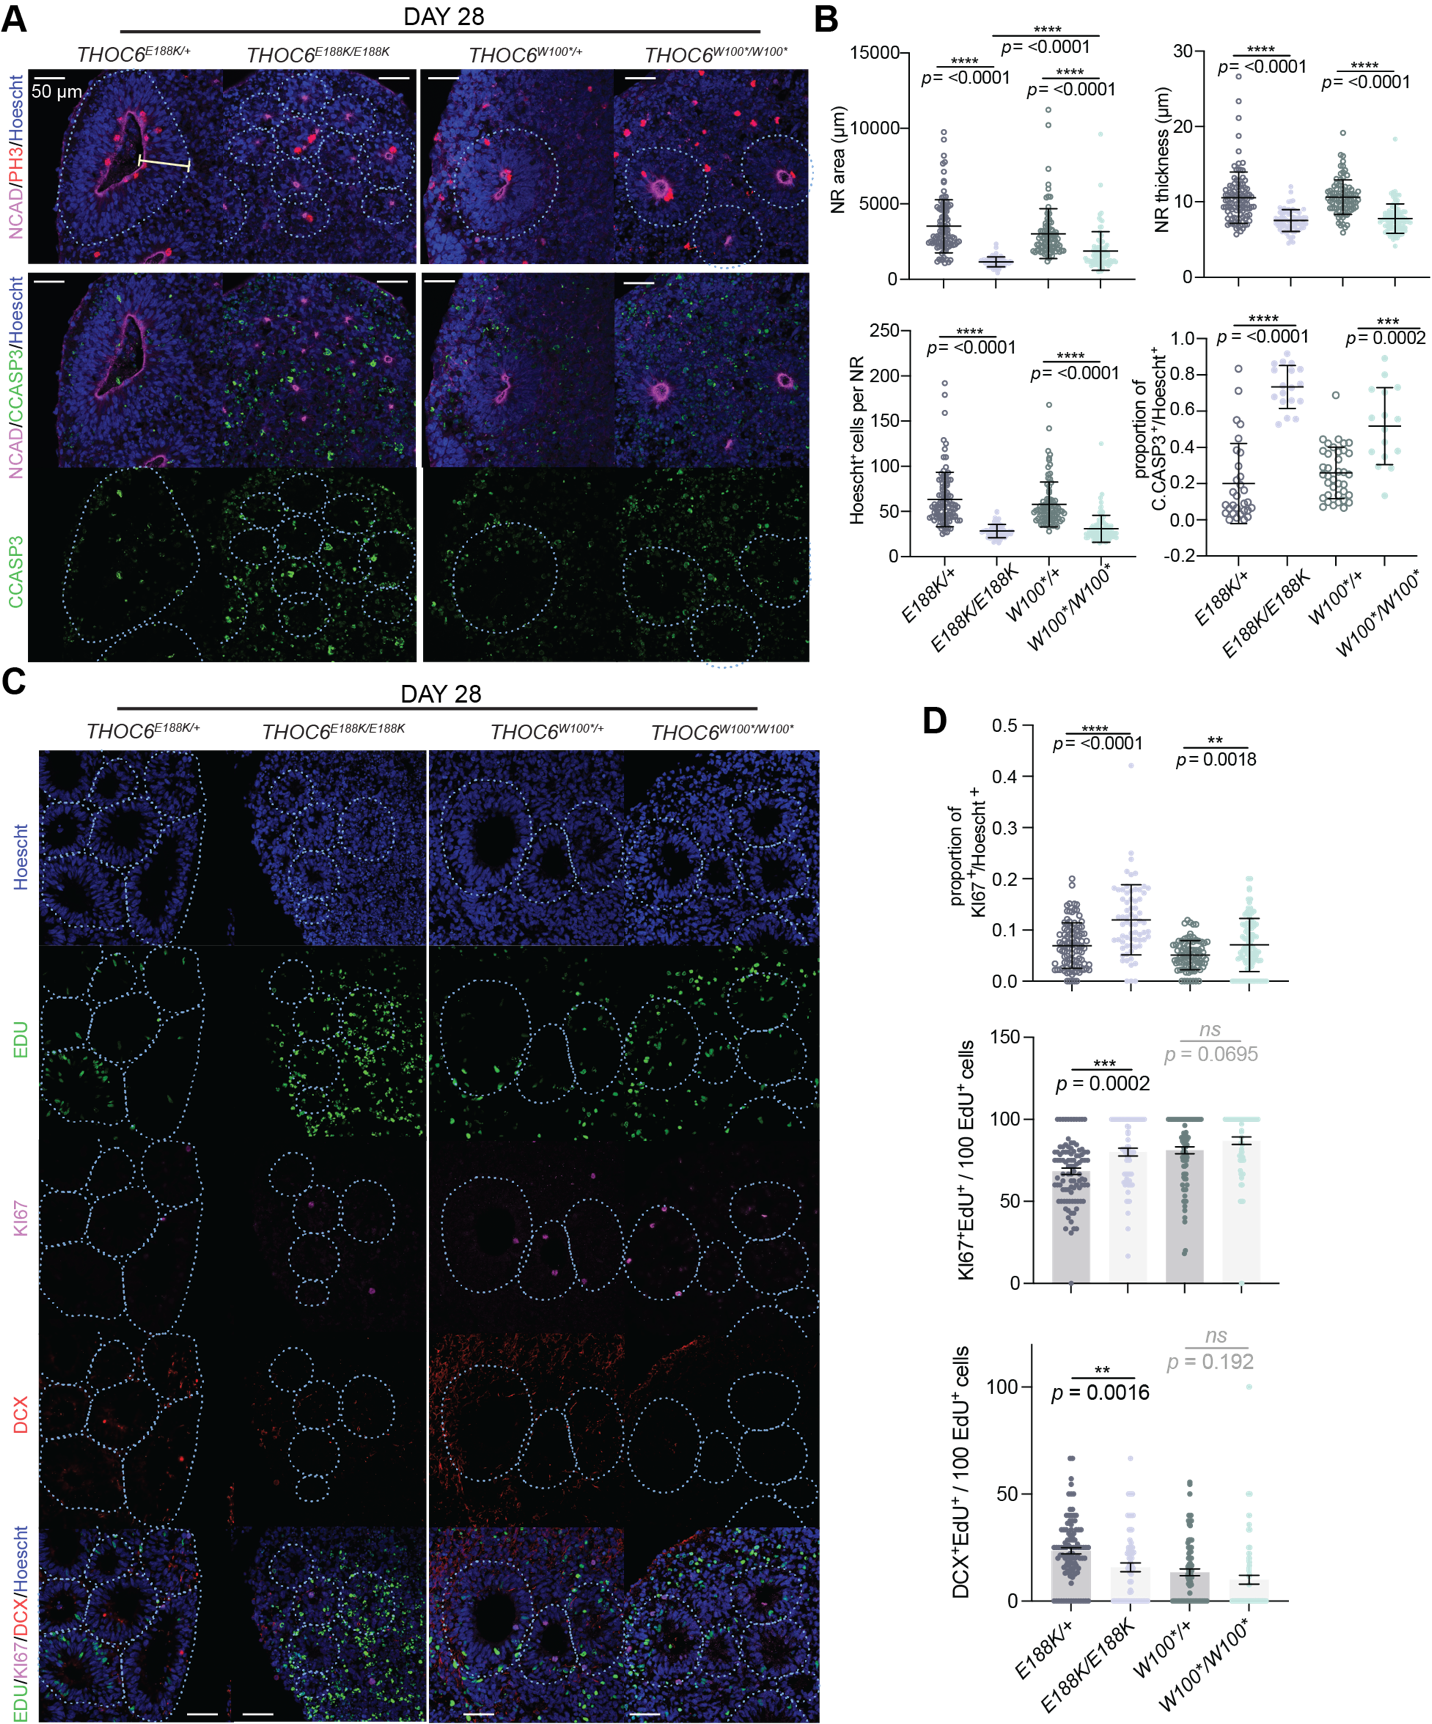


**Figure S7. Modeling of *THOC6* variant pathogenesis in human cerebral organoids.** *See also Figure 7.*(A) Immunostaining of PH3, N-Cadherin, C.CASP3, and Hoescht in day 28 human cerebral organoids differentiated from *THOC6E188K/+*, *THOC6E188K/E188K*, *THOC6W100*/+*, and *THOC6W100*/W100** iPSCs highlighting differences in neural rosette morphology. 40x magnification; Scale bar: 50 μm. (B) Quantifications by genotype of area, thickness, Hoescht+ cells, and C.CASP3+ cells per NR. NR (organoid) number analyzed across one differentiation replicate per genotype: *THOC6E188K/+* *n* = 30 (5); *THOC6E188K/E188K n* = 18 (5); *THOC6W100*/+* *n* = 37 (10); *THOC6W100*/W100** *n* = 16 (5). (C) Immunostaining of EDU, KI67, DCX to assess timing of differentiation in day 28 organoids with quantifications by genotype (D). NR (organoid) number analyzed across three differentiation replicates per genotype: *THOC6E188K/+* *n* = 100 (34); *THOC6E188K/E188K n* = 68 (25); *THOC6W100*/+* *n* = 87 (53); *THOC6W100*/W100** *n* = 89 (42). Significance, two-tailed unpaired *t* test. Data shown as mean ±SEM.

**Table S1. Clinical descriptions of individuals with TIDS in present study.**

| Proband | Clinical description | Genetic diagnosis | Variant Interpretationa |
| --- | --- | --- | --- |
| 1:II:1 | Proband 1 is from the Netherlands and of European ancestry. He was twelve months old at provided evaluation. The pregnancy was complicated by intrauterine growth restriction at thirty weeks of gestation. Proband 1 was born via a spontaneous vaginal delivery after 38 weeks and 3 days of gestation with a birth weight was 2.252 kg, and a length of 47 cm. Feeding problems were noted after birth. Gastroesophageal reflux disease was diagnosed requiring nasogastric tube feeding intervention. Growth parameters at four months of age included a length of 58 cm (<3rd centile), with a weight of 4.275 kg (<3rd centile) and an occipitofrontal circumference (OFC) of 38 cm (<3rd centile). Dysmorphic features include plagiocephaly, upslanting/narrow palpebral fissures, a straight nose with a broad nasal base, a smooth philtrum with a thin upper lip, and protruding ears with large, upturned earlobes (Figure 1B). A renal ultrasound revealed unilateral renal agenesis, though cardiac abnormalities were not detected by ultrasound evaluation. Marked signs of developmental delay at 12 months. Motor delays characterized by deficits in coordination required for prolonged prone positioning on his abdomen and inability to sit unassisted. | Karyotyping results were normal. Trio WES (mother/father/proband) was performed and identified two *THOC6* variants as high priority candidates for the clinical presentation observed for Proband 1. A previously described missense variant was maternally inherited and a novel truncating *THOC6* variant was paternally inherited: c.569G>A, (p.G190E) and c.139C>T, (p.Q47*) (Figure 1A). The c.139C>T, (p.Q47*) variant was not found in the gnomAD Browser (v2.1.1) and was submitted to ClinVar (https://www.ncbi.nlm.nih.gov/clinvar/; Submission ID:SUB5265728). The parents of Proband 1 were heterozygous for the identified variants, consistent with a recessive mode of inheritance. | p.G190E: pathogenic (ii);  p.Q47*: pathogenic (ia) |
| 2:III:2 | Proband 2 is the second-born of consanguineous parents of Turkish ancestry, three years old at provided evaluation (Figure 1A). Proband 2 was born full-term (41 weeks of gestation) with a birth weight of 2.7 kg (10th centile) and an OFC of 32.5 cm (<3rd centile). She exhibited global developmental delay, feeding problems, and persistent vomiting in the first few postnatal months, consistent with features of gastroesophageal reflux disease. Use of a nasoduodenal feeding tube supported slow, yet persistent weight gain. Physical examination revealed microcephaly and atypical facial features of epicanthus, long nose with low hanging columella, and upslanting palpebral fissures (Figure 1B). Cranial MRI revealed corpus callosum hypoplasia (Figure 1C). Frequent upper respiratory infections occurred one to three times per month. Echocardiogram demonstrated peripheral pulmonary stenosis and patent foramen ovale. Renal anatomy was unremarkable. At 3 years of age, weight was 13 kg (3rd centile), height was 95 cm (3rd centile) and OFC was 45 cm (<3rd centile). Severe intellectual disability was noted with delays in speech and communication requiring special rehabilitation intervention. Motor delays were observed. At time of evaluation, Proband 2 walked with an unsteady gait. While hearing and vision are normal, strabismus was observed. She has a high number of dental caries, in line with previously described BBIS dental anomalies. | Karyotyping results were normal. WES genetic testing identified a novel biallelic truncating variant c.299G>A, (p.W100*) in exon 4 of *THOC6* in Proband 2. At the time of identification, this variant was not reported and not observed in the gnomAD Browser (v2.1.1) and was submitted to ClinVar (https://www.ncbi.nlm.nih.gov/clinvar/; Submission ID: SUB5265724). Heterozygosity of the *THOC6* variant was confirmed by Sanger sequencing in the mother, as well as in an unaffected sibling. | p.W100*: pathogenic (ia) |
| 3:III:1 | Proband 3 is from the United States of European ancestry, eleven years old at provided evaluation. He was evaluated for multiple congenital anomalies during the newborn period. Microcephaly, deep set eyes, mild epicanthal folds, upslanting palpebral fissures were described during examination in infancy; prominent antihelices of the ears, broad nasal bridge, mild depression of the right nostril with evidence of right cleft lip repair, nasal columella extending below nares, and short philtrum were noted (Figure 1B). Clinical history at age eleven was significant for cleft lip, bifid uvula, ankyloglossia, horseshoe kidney, imperforate anus, developmental delay, autism, and partial complex seizures (onset at 11 years). Developmentally, receptive language skills were noted to be better than expressive language that was restricted to sign language, some words, and gesturing. Assistive technology was used to supplement this deficit. Reading and math skills at age eleven were measured to be equivalent to first grade level. On physical examination, both OFC and weight were less than the 2nd centile, and height was at the 5th centile. | Karyotype and FISH analysis for 22q11.2 were normal (Oxford Gene Technology Syndrome). Chromosome microarray (Affymetrix CytoScan Dx) identified a maternally inherited deletion on 5q21.1, the inheritance of which is inconsistent with genetic basis of BBIS clinical features. WES analysis of Proband 3 identified three previously described homozygous missense variants in *cis* in *THOC6* c.[298T>A;700G>C;824G>A], (p.[W100R;V234L;G275D]). This haplotype was previously reported in three other individuals with BBIS from unrelated families (6, 20). In all cases, no consanguinity was reported. The parents of Proband 3 are heterozygous for the identified variants, indicating biparental inheritance of the *THOC6* variants. | p.W100R, p.V234L, & p.G275D: pathogenic (ii) |
| 4:IV:1 | Proband 4 was evaluated at thirteen years of age and is the first-born of third-degree consanguineous parents from Southern India (Figure 1A). She weighed 2.75 kg at birth and had complaints of repeated lower respiratory tract infections since the newborn period. Developmental delay, predominantly cognitive, was noted. She crawled at nine months, sat at one year and walked at two years. At present, she says bisyllables only. She exhibited friendly behavior. Examination revealed an OFC of 44.5 cm (<3rd centile, -7 SD) and a height of 122 cm (normal). Facial dysmorphism included upslanting palpebral fissures, epicanthal folds, microcornea, long nose with overhanging columella, thick vermillion borders, and crowded teeth (Figure 1B). Upon neurological examination, she had contractures at the ankle, normal to increased tone, and normal deep tendon reflexes. Vision and hearing were normal. Brain imaging results were also normal. | [see below] | p.G275D is likely pathogenic (ii) |
| 4:IV:2 | Individual 5 (4:IV:2) is the affected sibling of Proband 4 (Figure 1A). She was eight years old upon examination. She presented with global developmental delay like her elder sibling. She achieved head control at five months of age, sat with support at one year, and stood with and without support at one and two years, respectively. Presently, she follows simple commands. Parents also reported nocturnal enuresis. Her OFC was 44.5 cm (<3rd centile, -6 SD). She was 104 cm tall and weighed 12 kg. Epicanthal folds, microretrognathia, cleft palate, and U-shaped uvula were noted upon examination (Figure 1B). Vision and hearing were normal. | Karyotyping results were normal for both siblings. The biallelic missense variant c.824G>A, (p.G275D) in exon 12 of *THOC6* was identified in both Proband 4 and Individual 5 using WES testing. Variant p.G275D has previously been observed in individuals with BBIS and its submission accession is SCV000741884.1. The parents were heterozygous for the identified variants, as confirmed by Sanger sequencing and consistent with the mode of inheritance (Figure 1A). | p.G275D is likely pathogenic (ii) |
| 5:II:3 | Proband 5 was born to consanguineous parents of Moroccan ancestry. She has a healthy dizygotic twin sister as well as a healthy older sister and younger brother. She was born at 37 weeks of gestation with birth parameters of -2 SD (birth weight of 2.08 kg, birth length of 44 cm, and OFC of 31 cm). She presented short-segment Hirschsprung disease, submucous cleft palate, and unilateral choanal stenosis that was surgically repaired at 18 months. She has delayed psychomotor development and overall growth (parameters of -2 SD). She is shy with nasal speech limited to short sentences. At 10 years of age, she has a long narrow face, arched eyebrows, convergent strabismus, a tubular nose with a high nasal bridge, short columella, cupid bow-shaped mouth, and normal ears. Cutaneous 2-3 syndactyly on her feet and clinodactyly of the 5th fingers were also noted. No ophthalmologic abnormalities were present except for convergent strabismus. Auditory evoked potential (AEP), brain and temporal bones CT-scan, and cardiac ultrasound were normal. | 800-bands resolution karyotype showed normal chromosomes on lymphocytes, 46XX, with no 22q11.2 deletion by FISH anailysis at the TUPPLE1 locus. WES analysis identified biallelic variants of c.740G>A, (p.R247Q). Variant was absent in unaffected siblings whereas unaffected parents were heterozygous for the variant. Results confirmed by Sanger sequencing and consistent with recessive mode of inheritance. | p.R247Q is likely pathogenic (ii) |
| 6:IV:1 | Proband 6 was 13 months old at last examination. He had an OFC of 42.5 cm (-3/4 SD) that is likely progressive. Proband 6 has dysmorphic facial features. Hypotonicity, no spasticity, and absent tendon reflexes were noted upon neurological examination. He has hypoplastic genitalia. MRI revealed atrophy of cortex and cerebellum as well as ventriculomegaly and a thin corpous callosum. Proband 6 had intermediate delayed psychomotor development. | WES analysis identified biallelic variants of c.562G>A, (p.E188K). Variant was absent in unaffected siblings whereas unaffected parents were heterozygous for the variant. Results confirmed by Sanger sequencing and consistent with recessive mode of inheritance. | p.E188K is likely pathogenic (ii) |
| 7:V:1 | Proband 7 had an OFC of -5 SD. He has epilepsy and micropenis. | WES analysis identified biallelic variants of c.299G>A, (p.W100*). Variant was absent in unaffected siblings whereas unaffected parents were heterozygous for the variant. Results confirmed by Sanger sequencing and consistent with recessive mode of inheritance. | p.W100*: pathogenic (ia) |

aAccording to American College of Medical Genetics and Genomics (ACMG) guidelines

**Table S2: Clinical summary of all reported individuals with TIDS.** Absence of features may be due to lack of reporting.

| Clinical feature | Prevalence |  |
| --- | --- | --- |
|  | current study | all published (excluding prenatal report) |
| Intellectual disability | 8 / 8 (100%) | 33 / 33 (100%) |
| Facial dysmorphisms | 8 / 8 (100%) | 31 / 33 (93.9%) |
| Microcephaly | 8 / 8 (100%) | 27 / 33 (81.8%) |
| Teeth anomalies | 2 / 8 (25%) | 15 / 33 (45.5 %) |
| Short stature | 3 / 8 (37.5%) | 13 / 33 (39.4%) |
| Cardiac defects | 1 / 8 (12.5%) | 12 / 33 (36.4%) |
| Renal malformations | 3 / 8 (37.5%) | 11 / 33 (33.3%) |
| Genitourinary issues | 4 / 8 (50%) | 21 / 33 (63.6%) |
| Feeding difficulties | 2 / 8 (25%) | 6 / 33 (18.2%) |
| Ventriculomegaly | 1 / 8 (12.5%) | 7 / 33 (21.2%) |
| ASD or autistic features | 1 / 8 (12.5%) | 8 / 33 (24.2%) |

**Table S3: PCR, RT-PCR, and qRT-PCR primer sequences for human and mouse samples.**

| Primer type | **ID** | **forward sequence** | **reverse sequence** | **Species** |
| --- | --- | --- | --- | --- |
| *PCR* | THOC6 genotyping | 5' CTTCAGGACTTTGGGTGGGA 3' | 5' AAAGAACTGTGAGTGGTGCC 3' | human |
|  | Thoc6 genotyping | 5' ACGAGAAGAGCCACCATCAG 3' | 5' ATCACTTTTCGTGGGCTCAG 3' | mouse |
| *RT-PCR* | ABCA1 SE | 5' CATTCAGATGCACGTCTGCT 3' | 5' GCTGGCTGTCAAAGAGGAAC 3' | human |
|  | POU2F2 SE | 5' TTCTGCATGTCCTTCACTGC 3' | 5' CTTGCTCCAATTCCTGCTGT 3' | human |
|  | MAPK15 RI | 5' CCAGACAGCAGAAACCCTGT 3' | 5' TTGGGGGTCTCTGACATAGG 3' | human |
|  | Thoc6 splice site | 5' GTTCCCATCGTTCGTACTGG 3' | 5' GCTTTGAAGGAAGCCAACTG 3' | mouse |
|  | Admts6 RI | 5' GTTCCCATCGTTCGTACTGG 3' | 5' GCTTTGAAGGAAGCCAACTG 3' | mouse |
|  | Fam214b RI | 5' CAGGCTTGAGGCTTCTTCAT 3' | 5' GGTTCTTCAGGGGGTAGTCC 3' | mouse |
|  | Cenpt RI | 5' TCCTCCAGCACACATGACTC 3' | 5' CTGGATGGGCACTTAGCTGT 3' | mouse |
| *qRT-PCR* | GAPDH qPCR | 5' TCTTTTGCGTCGCCAGCCGA 3' | 5' ACCAGGCGCCCAATACGACC 3' | human |
|  | FOS qPCR | 5' GTGGGAATGAAGTTGGCACT 3' | 5' CTACCACTCACCCGCAGACT 3' | human |
|  | THOC6 qPCR | 5' CGACTGGATGGTCTGTGGAG 3' | 5' CCTGGTAGAAGGTGACGTGC 3' | human |
|  | MEG3 qPCR | 5' GCATTAAGCCCTGACCTTTG 3' | 5' TCCAGTTTGCTAGCAGGTGA 3' | human |
|  | MEG8 qPCR | 5' CCTCAGTATCCTGCGAGCTG 3' | 5' AAGTCAGACCCAGGCAACAC 3' | human |
|  | ESRG qPCR | 5' CAGCCTTGTACCCTGGTCTT 3' | 5' ATGCATTGGCTTGTTGCTGA 3' | human |
|  | NEAT1 qPCR | 5' GGCAGGTCTAGTTTGGGCAT 3' | 5' CCTCATCCCTCCCAGTACCA 3' | human |
|  | TGFB2 qPCR | 5' AAGAAGCGTGCTTTGGATGCGG 3' | 5' ATGCTCCAGCACAGAAGTTGGC 3' | human |
|  | ID4 qPCR | 5' GGACCTGTCCAGCCGCGCC 3' | 5' TCAGCGGCACAGAATGCTGTCG 3' | human |
|  | TP53 qPCR | 5' CCTCAGCATCTTATCCGAGTGG 3' | 5' TGGATGGTGGTACAGTCAGAGC 3' | human |
|  | PAX6 qPCR | 5' CTGAGGAATCAGAGAAGACAGGC 3' | 5' ATGGAGCCAGATGTGAAGGAGG 3' | human |
|  | CXXC4 qPCR | 5' TGCCCGCAGAATCATTCCTCCT 3' | 5' ACGCCACAGTTGATGAGCCTCT 3' | human |
|  | WNT7A qPCR | 5' AGGAGAAGGCTCACAAATGGGC 3' | 5' CGGCAATGATGGCGTAGGTGAA 3' | human |
|  | Ier3 qPCR | 5' CCATCTCCACACCATGACTG 3' | 5' CTCCGAGGTCAGGTTCAAAG 3' | mouse |
|  | Islr2 qPCR | 5' CTGCAAGTCAGAGAGCAGCA 3' | 5' AACTGGTGGGCGTACTTGTC 3' | mouse |
|  | Thoc6 qPCR | 5' GCAACAATTACGGGCAGATT 3' | 5' CAACCCTTGACCTCTCCATC 3' | mouse |
|  | Anxa2 qPCR | 5' CATTCTACACCCCCAAGTGC 3' | 5' CTGATAGGCGAAGGCAATGT 3' | mouse |
|  | Vegfa qPCR | 5' GGTTCCAGAAGGGAGAGGAG 3' | 5' GGCAGTAGCTTCGCTGGTAG 3' | mouse |
|  | Kcnt2 qPCR | 5' AAGGCTGGCAAAATGATGAC 3' | 5' CTGTGACGGTTTCTCAAGCA 3' | mouse |
|  | Wnt7a qPCR | 5' GGTGCGAGCATCATCTGTAA 3' | 5' TGGTACTGGCCTTGCTTCTC 3' | mouse |
| *sgRNA* | *Thoc6fs/fs* sgRNA | 5' CACCGCACCGCTCGCGGTGCCTCT 3' | 5' CAGAGGCACCGCGAGCGGTGCCAAA 3' | mouse |

**Table S4. RSEM counts for hNPCs, mouse E9.5 forebrain, and ERCC samples.**

**Table S5. rMATS junction counts results for hNPCs.** Results for *THOC6W100*/+* versus *THOC6E188K/E188K* highlighted in purple, and comparison of *THOC6W100*/+* versus *THOC6W100*/W100** in green. Event types:SE, skipped exon; RI, retained intron; A5SS, alternative 5’ splice site; A3SS, alternative 3’ splice site; MXE, mutually exclusive exon. ΔPSI values are relative to affected genotypes. Inclusion level 1 is unaffected and inclusion level 2 is affected. Negative PSI indicate stronger inclusion in affected.

**Table S6. rMATS junction counts for mouse E9.5 forebrain.** Results for comparison of *Thoc6+/+* versus *Thoc6fs/fs*.Event types:SE, skipped exon; RI, retained intron; A5SS, alternative 5’ splice site; A3SS, alternative 3’ splice site; MXE, mutually exclusive exon. ΔPSI values are relative to *Thoc6fs/fs*.Inclusion level 1 is for *Thoc6+/+* and inclusion level 2 is *Thoc6fs/fs*. Negative PSI indicate stronger inclusion in affected.
